# Supplementary material for: Sustainable biodiesel production: catalyst-free palm fatty acid distillate conversion to methyl esters by using a superheated methanol vapor process
Source: Royal Society of Chemistry journal article supplement (doi:10.1039/d5se01182e), 2025-12-18
Supplement: d5se01182e1.pdf [file d5se01182e1.pdf]

## Supplementary Information

### **Sustainable Biodiesel Production: Catalyst-Free Palm Fatty Acid Distillate Conversion to Methyl Esters by Using Superheated Methanol Vapor Process**

Maharani Dewi Solikhah<sup>a,b</sup>, Soni Solistia Wirawan<sup>b</sup>, Anto Tri Sugiarto<sup>c</sup>, Dyah Wulandani<sup>a,d</sup>, Shoji Hagiwara<sup>e</sup>, Tetsuya Araki<sup>f</sup>, Hiroshi Nabetani<sup>g</sup>, Yohanes Aris Purwanto<sup>a\*</sup>

<sup>a</sup>Department of Mechanical and Biosystem Engineering, IPB University, Bogor, Indonesia

<sup>b</sup>Research Center for Fuel Technology, National Research and Innovation Agency, South Tangerang, Indonesia

<sup>c</sup>Research Center for Smart Mechatronics, National Research and Innovation Agency, Bandung, Indonesia

<sup>d</sup>CREATA (Center for Research on Engineering Applications in Tropical Agriculture), Bogor, Indonesia

<sup>e</sup>Food Research Institute, NARO, 2-1-12 Kannondai, Tsukuba, Ibaraki 305-8642, Japan

<sup>f</sup>Department of Global Agricultural Sciences, Graduate School of Agricultural and Life Sciences, The University of Tokyo, Yayoi 1-1-1, Bunkyo Ward, Tokyo 113-8657, Japan

<sup>g</sup>Department of Food and Nutrition, Tokyo Kasei University, 1-18-1 Kaga, Itabashi, Tokyo 173-9602, Japan

\*Corresponding author: [arispurwanto@apps.ipb.ac.id](mailto:arispurwanto@apps.ipb.ac.id)

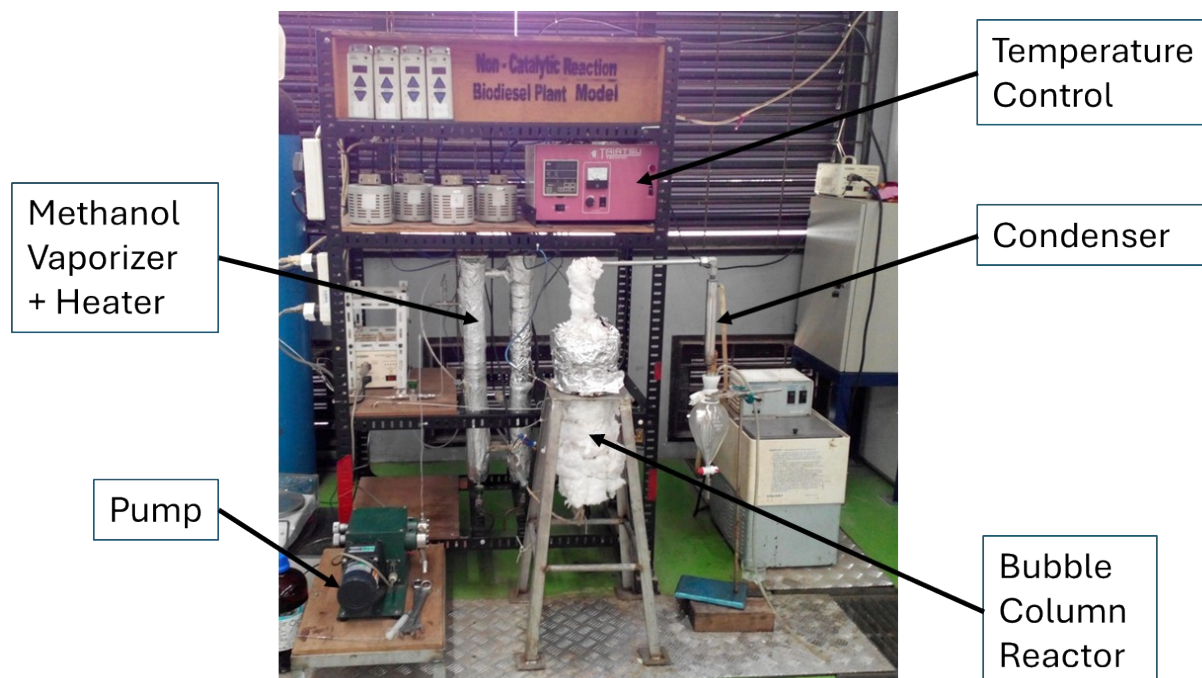

S1. The experimental set up used in this research

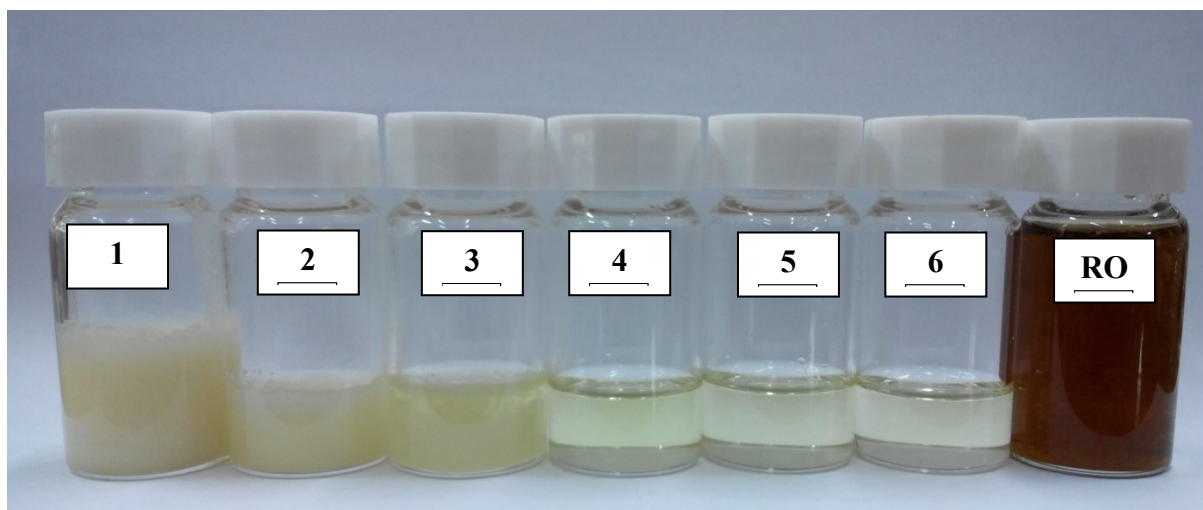

S2. The appearance of the product collected from reactor. Number 1 until 6 are products collected from reactor at 30, 60, 90, 120, 150, and 180 minutes of reaction, respectively. RO is the remaining oil that collected from the bottom of the reactor after the reaction finished.
